# Supplementary material for: Tetraspanins predict the prognosis and characterize the tumor immune microenvironment of glioblastoma
Source: Springer Nature journal article supplement (doi:10.1038/s41598-023-40425-w), 2023-08-16
Supplement: MOESM1 [file 41598_2023_40425_MOESM1_ESM.pdf]

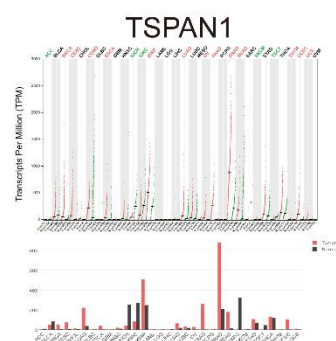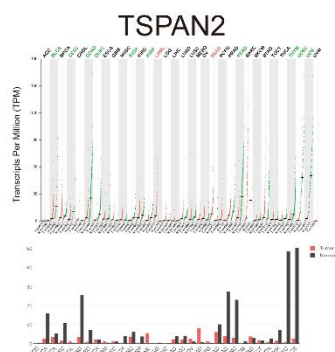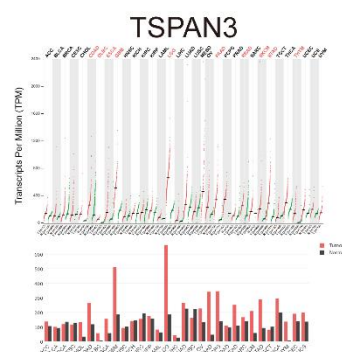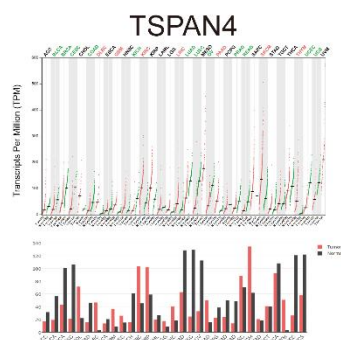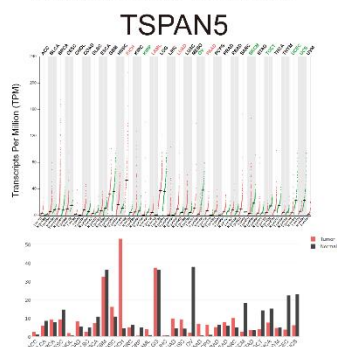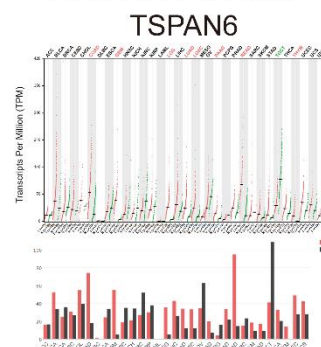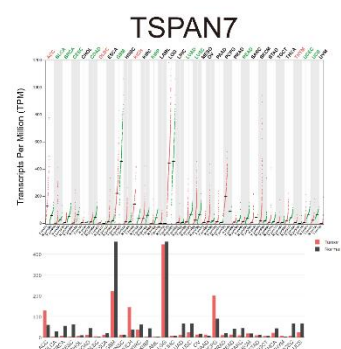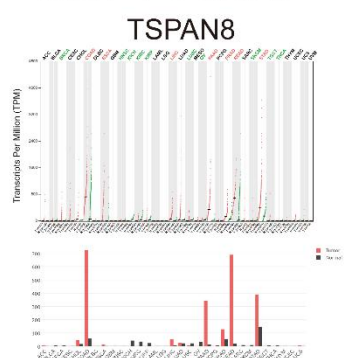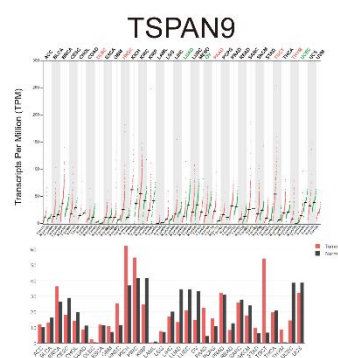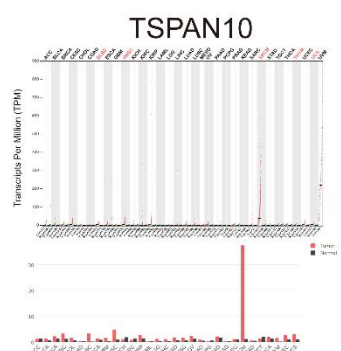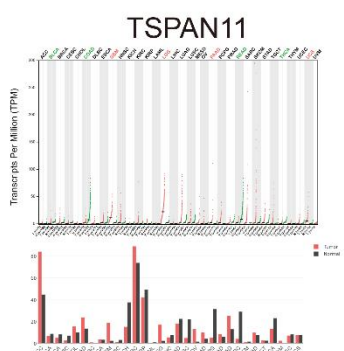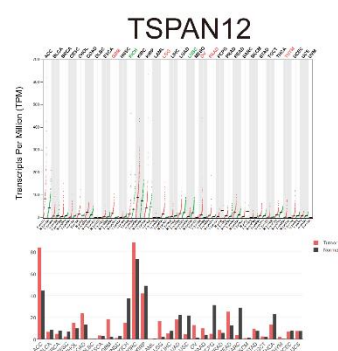

TSPAN13

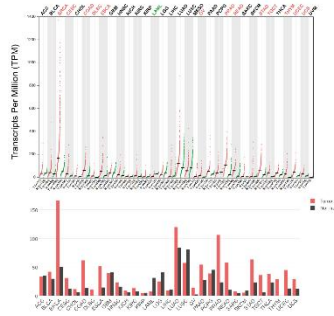

TSPAN14

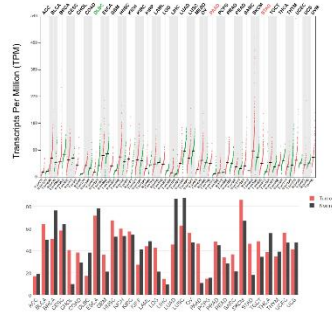

TSPAN15

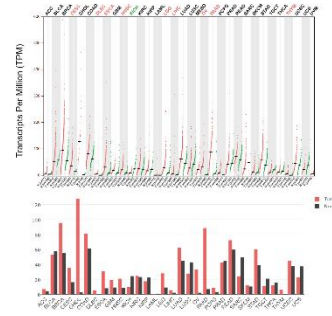

TSPAN16

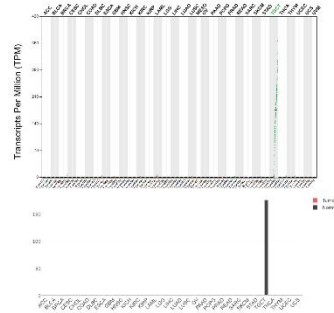

TSPAN17

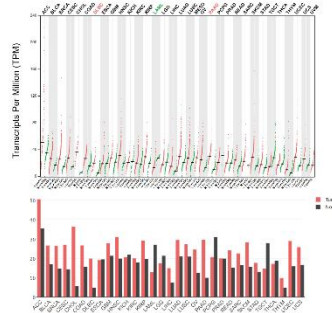

TSPAN18

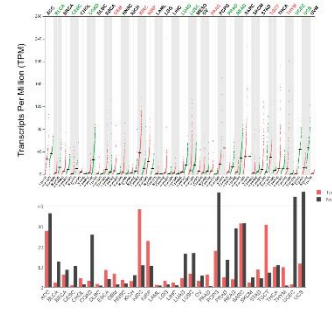

TSPAN19

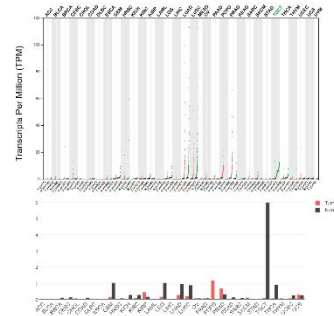

TSPAN20 (UPK1B)

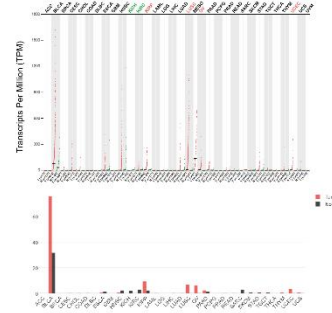

TSPAN21 (UPK1A)

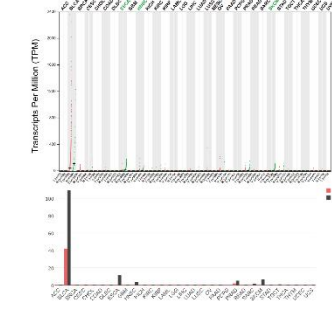

TSPAN22 (PRPH2)

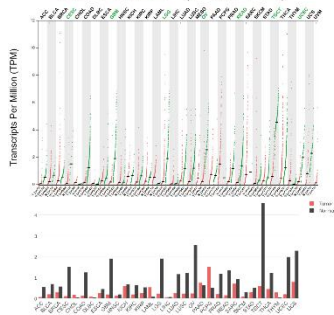

TSPAN23 (ROM1)

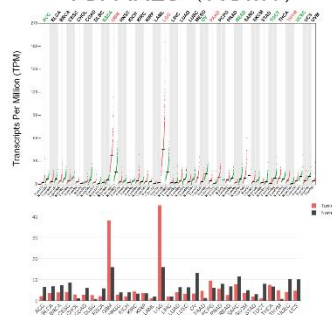

TSPAN24 (CD151)

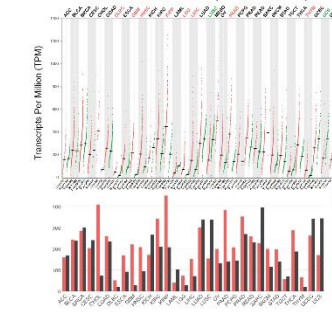

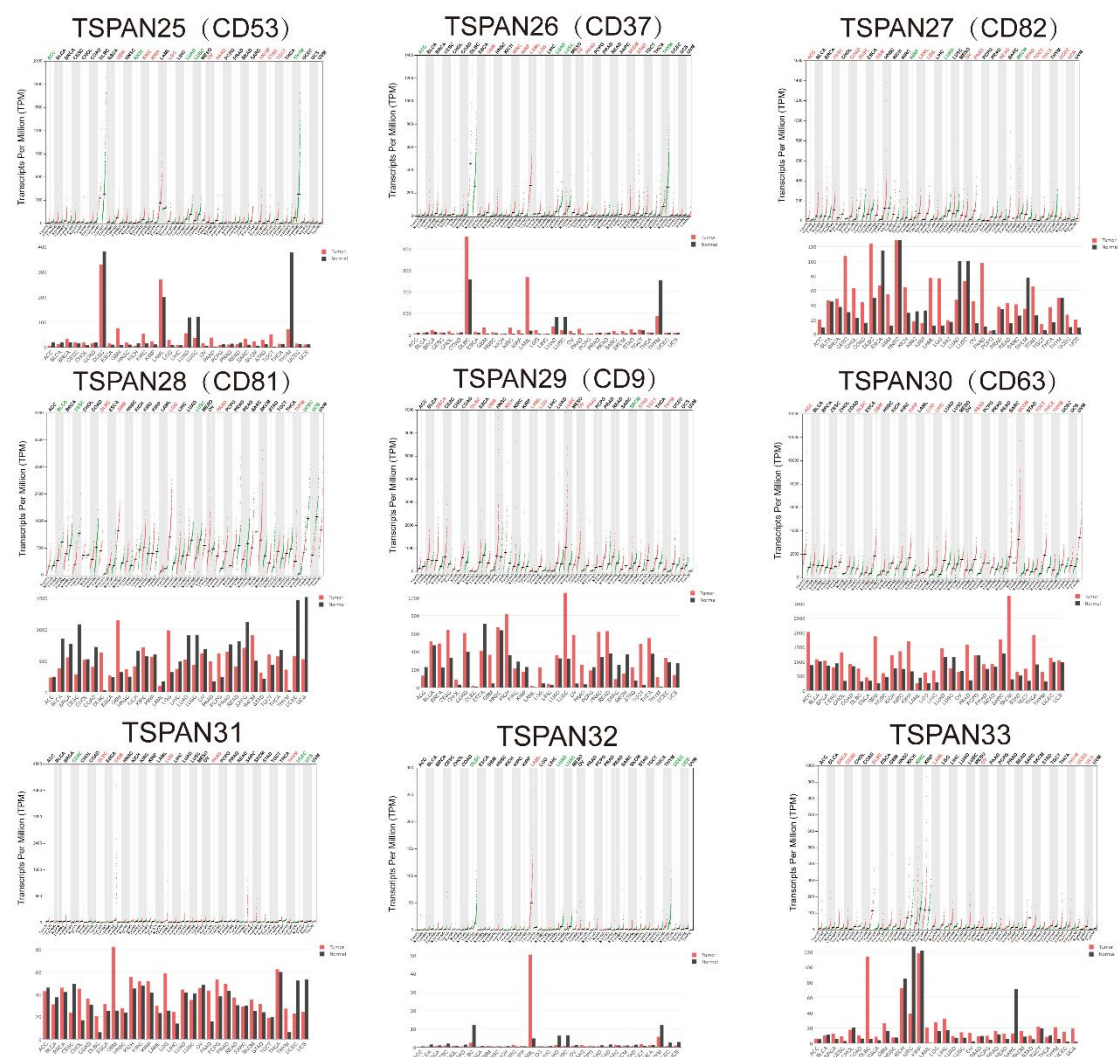

**Additional file 1** Analysis of pan-cancer TSPAN expression levels using the Gene Expression Profiling Interactive Analysis database.
